# Supplementary material
Source: PubMed Central journal article supplement (PMC3228852)
Supplement: NIHMS91098-supplement-1_si_001.pdf [file NIHMS91098-supplement-1_si_001.pdf]

## Supporting Information Available

**Supplementary Figure S1. Disulfide bond and tryptic sites in Brain Natriuretic peptide-32.** Tryptic sites in BNP-32 are indicated by black lines. The disulfide bridge between Cys10 and Cys26 in BNP-32 forms a loop structure. Cleavage at any of the tryptic sites in this loop region (Arg13, Lys14 and Arg17) results in peptides with an inter-chain disulfide bond, and failure to cleave in the loop region results in peptides with an intra-chain disulfide bond.

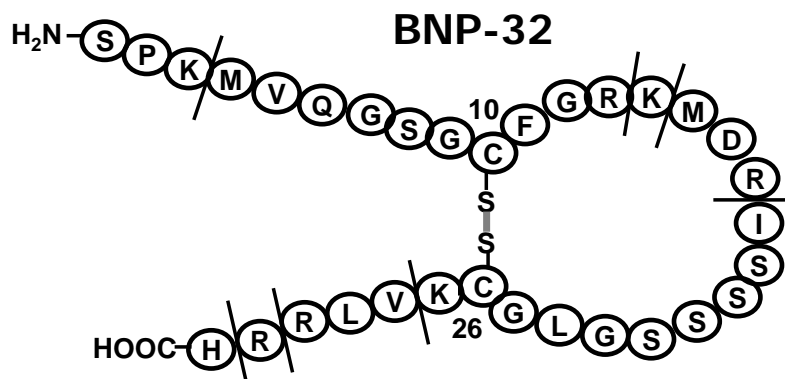

**Supplementary Table S1. Inter- and intra-chain disulfide bonds identified in BNP-32.** Examples of disulfide-linked peptides identified from BNP-32. Grey lines indicate a disulfide bridge and black lines indicate an un-cleaved peptide sequence. Amino acid sequence derived from the sequence tags is underlined in each peptide.

| Precursor Mass | Sequence Tag(s)           | Peptide Mass           | Modification mass      | DiS species                              | MMA (ppm) |
|----------------|---------------------------|------------------------|------------------------|------------------------------------------|-----------|
| 1975.9072      | MVQ*****<br>IS*****       | 1040.4531<br>937.4539  | 935.4529<br>1038.4408  | <u>MVQ</u> GSGCFGR<br>ISSSSGLGCK         | 3.2       |
| 2344.1629      | -VQG*****<br>ISSSSGL***** | 1040.4531<br>1305.7074 | 1303.6958<br>1038.4242 | <u>MVQ</u> GSGCFGR<br>ISSSSGLGCKVLR      | 2.3       |
| 3186.6154      | SPKm*****<br>M*****SS     | 1352.6329<br>1835.9782 | 1833.9752<br>1350.6257 | <u>SPKM</u> VQSGCFGR<br>MDRISSSSGLGCKVLR | 2.3       |
| 3149.5533      | mvQ*****<br>***RH         | 1168.5481<br>679.4241  | 1990.6086<br>2470.1242 | <u>MVQ</u> GSGCF<br>HRRLVKCG             | 1.8       |
| 3461.7522      | spKM*****R<br>***RRH      | 1882.8963<br>679.4241  | 1578.8300<br>2782.31   | <u>SPKM</u> VQSGCFRI<br>HRRLVKCGLG       | 3.9       |
| 3168.5792      | spKmvQ--S*****            | 3170.5932              | -2.0139                | <u>SPKM</u> VQSGCFGRK<br>RLVKCGLGS       | 0.2       |
